# Supplementary material for: Smek1 deficiency exacerbates experimental autoimmune encephalomyelitis by activating proinflammatory microglia and suppressing the IDO1-AhR pathway
Source: PubMed Central journal article supplement (PMC8237434; doi:10.1186/s12974-021-02193-0), 2021-06-28
Supplement: 12974_2021_2193_MOESM2_ESM.pdf [file 12974_2021_2193_MOESM2_ESM.pdf]

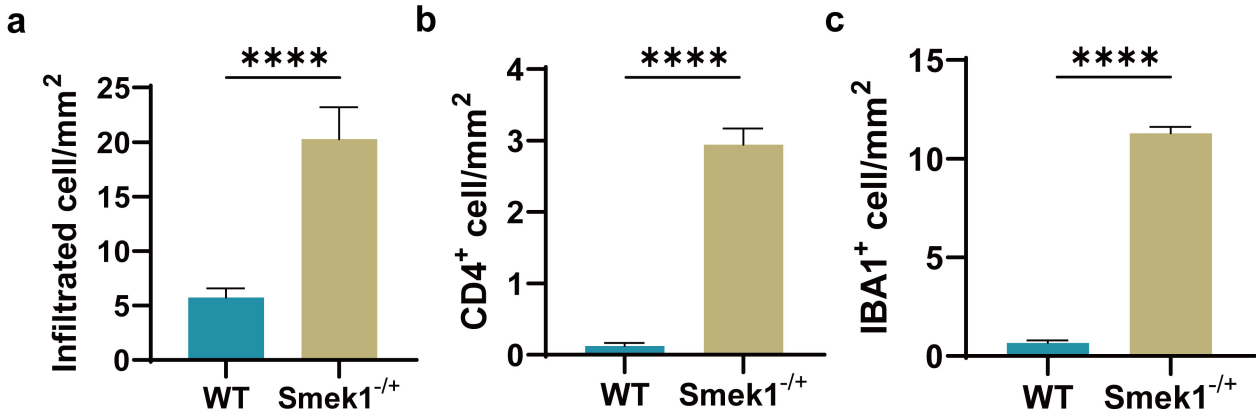

**Fig.S2 Quantification of infiltrated cells in EAE spinal cords.**

**(a) Representative analysis of infiltrated cell counts in H&E stainings of EAE spinal cords (n=5 in each group).**

**(b) Representative analysis of CD4-positive cells in EAE spinal cords (n=5 in each group).**

**(c) Representative analysis of IBA1-positive cells in EAE spinal cords (n=5 in each group).**

**Data are represented as mean  $\pm$  SEM and were analyzed by the two-sided unpaired t test. \*\*\*\*, p < 0.0001.**
